1 **Identification and characterization of phlorizin transporter from *Arabidopsis***  
2 ***thaliana* and its application for phlorizin production in *Saccharomyces cerevisiae***

3 Zeinu Mussa Belew<sup>1</sup>, Christoph Crocoll<sup>1</sup>, Iben Møller-Hansen<sup>2</sup>, Michael Naesby<sup>3</sup>, Irina Borodina<sup>2</sup>, Hussam  
4 Hassan Nour-Eldin<sup>1\*</sup>

5

6 <sup>1</sup>*DynaMo Center, Copenhagen Plant Science Center, Department of Plant and Environmental Sciences,*  
7 *University of Copenhagen, 1871 Frederiksberg, Denmark*

8 <sup>2</sup>*The Novo Nordisk Foundation Center for Biosustainability, Technical University of Denmark, Kemitorvet 220,*  
9 *2800 Kongens Lyngby, Denmark*

10 <sup>3</sup>*Evolva SA, Duggingerstrasse 23, 4153 Reinach, Switzerland*

11

12 **\*Corresponding author:** Hussam H. Nour-Eldin ([huha@plen.ku.dk](mailto:huha@plen.ku.dk))

13

14

15

16

17

## 18 **Abstract**

19 Bioengineering aimed at producing complex and valuable plant specialized metabolites in microbial hosts  
20 requires efficient uptake of precursor molecules and export of final products to alleviate toxicity and  
21 feedback inhibition. Plant genomes encode a vast repository of transporters of specialized metabolites that—  
22 due to lack of molecular knowledge—remains largely unexplored in bioengineering. Using phlorizin as a case  
23 study—an anti-diabetic and anti-cancerous flavonoid from apple—we demonstrate that brute-force  
24 functional screening of plant transporter libraries in *Xenopus* oocytes is a viable approach to identify  
25 transporters for bioengineering. By screening 600 *Arabidopsis* transporters, we identified and characterized  
26 purine permease 8 (AtPUP8) as a bidirectional phlorizin transporter. Functional expression in the plasma  
27 membrane of a phlorizin-producing yeast strain increased phlorizin titer by more than 80 %. This study  
28 provides a generic approach for identifying plant exporters of specialized metabolites and demonstrates the  
29 potential of transport-engineering for improving yield in bioengineering approaches.

30

31

32

33

34

35

## 36 **Keywords**

37 Phlorizin transporter, transport-engineering, *Saccharomyces cerevisiae*, purine permease family (PUP),  
38 *Xenopus laevis* oocytes

39

## 40 **Abbreviations**

41 UGT, UDP-dependent-glycosyltransferase; HRT, homologous recombination tag; OD<sub>600</sub>, optical density at 600  
42 nm; LC-MS, liquid chromatography mass spectrometry

## 43 1. Introduction

44 Plants synthesize a vast number of specialized small molecules that have pharmaceutical and nutraceutical  
45 values. These molecules are usually produced in minute amounts in the natural plant host, wherefrom  
46 extraction may be costly, insufficient and time-consuming (Liu et al., 2017; Lv et al., 2016). As a promising  
47 alternative, bioengineering in microorganisms such as *Saccharomyces cerevisiae* and *Escherichia coli* has  
48 emerged as a sustainable and cost-effective means for large-scale production of high-value plant natural  
49 products (Keasling, 2012; Krivoruchko and Nielsen, 2015; Suzuki et al., 2014).

50 For any bioengineering approach, transport proteins play critical roles in uptake of nutrients, cofactors and  
51 precursors and also for secretion of final products to alleviate toxicity and feedback inhibition that may  
52 hamper yield (Jones et al., 2015; Lee et al., 2012; Liu et al., 2017; Shu and Liao, 2002).

53 Transporters native to the producing microbial cell factory (endogenous transporters) or heterologous  
54 transporters obtained from other organisms can be utilized in transport-engineering approaches aimed at  
55 improving these transport processes. Most studies implementing transport-engineering have so far targeted  
56 microbial transporters. For example, tolerance of *E. coli* was improved by applying directed evolution to  
57 enhance the export efficiency of AcrB towards toxic biofuels and plastic precursors (Fisher et al., 2014; Foo  
58 and Leong, 2013). In other examples, overexpression of YddG, MsbA and YadH improved secretion and  
59 thereby production of various amino acids, biofuels and plant natural products such as anthocyanins in *E. coli*  
60 (Doroshenko et al., 2007; Doshi et al., 2013; Lim et al., 2015).

61 Given the enormous diversity of chemical structures in plant specialized metabolism, the field of transport-  
62 engineering will require access to a large repository of transporters. The general participation of separate  
63 organs and/or cells in the synthesis and accumulation of plant specialized metabolites indicates that plant  
64 genomes encode a plethora of specialized metabolite transporters (Shitan, 2016; Yazaki, 2005). However, in  
65 the context of bioengineering, plant transporters remain largely unexplored.

66 In this study, we seek to address two challenges; i) how to identify plant transporters relevant for a given  
67 bioengineering approach and ii) demonstrating the potential of using plant transporters to improve  
68 production in a given bioengineering approach.

69 As a case study, we focus on phlorizin, a dihydrochalcone *O*-glucoside predominantly found in apple (*Malus*  
70 sp.), which is comprised of a glucose moiety and two aromatic rings joined by an alkyl spacer. Phlorizin is  
71 medicinally important as it decreases blood glucose levels, has been used as both a remedy and a tool to  
72 study renal physiology for nearly two centuries and has been used as a blueprint to develop several

73 commercialized anti-diabetic drugs (Ehrenkranz et al., 2005; Kramer and Zinman, 2019; Meng et al., 2008;  
74 Nomura et al., 2010; Scheen, 2015).

75 Recently, a pathway consisting of seven enzymes was engineered into *S. cerevisiae* for *de novo* production of  
76 phlorizin (Eichenberger et al., 2017). The titer is low for industrial production indicating that optimization of  
77 the biosynthesis pathway is possible, for example by increasing cytoplasmic malonyl-CoA, altering gene copy  
78 number, enzyme origins, and culture conditions (Galanie and Smolke, 2015; Li et al., 2015; Rodriguez et al.,  
79 2015). Although precursor supply (such as malonyl-CoA, a ) is a major bottleneck for microbial production of  
80 flavonoids in general and phlorizin in particular (Delmulle et al., 2018; Eichenberger et al., 2017), product  
81 toxicity, negative feedback inhibition by intermediates (such as cinnamic acid and p-coumaric acid) on early  
82 biosynthetic enzymes (Blount et al., 2000; Lam et al., 2008; Sarma and Sharma, 1999) and by-product UDP  
83 inhibition on the last biosynthetic enzyme UGT (Zhang et al., 2016) could hamper overall flux into the  
84 phlorizin pathway.

85 Phlorizin is a polar compound that requires a membrane-bound transporter protein to traverse membranes.  
86 In this study, we explore whether titer can be increased by expressing an efficient phlorizin exporter to  
87 improve product secretion from the phlorizin producing yeast strain. To test this hypothesis, we faced a  
88 typical knowledge gap in plant specialized metabolism, which is that as of date, no phlorizin transporters  
89 have been identified.

90 We have developed a functional genomics approach wherein we build and functionally screen sequence-  
91 indexed full-length transporter cDNA libraries in *Xenopus* oocytes for activity towards target compounds  
92 (Nour-Eldin et al., 2006). Here, we screen a library consisting of 600 transporters from *Arabidopsis* and  
93 identify the first reported phlorizin transporter. Extensive biophysical characterization in *Xenopus* oocytes  
94 reveals a passive, medium-affinity, proton gradient-independent, bidirectional transport activity, which  
95 when introduced into a phlorizin producing yeast strain increased titer significantly. The transporter belongs  
96 to the purine permease family (PUP) present in all plants, which here has its substrate spectrum expanded  
97 to include a novel class of specialized metabolites. This study provides a generic approach for identifying  
98 plant exporters of specialized metabolites and demonstrates the potential of transport-engineering for  
99 improving yield in bioengineering of plant specialized metabolites.

## 100 2. Materials and Methods

### 101 2.1 *Transporter cDNA library and in vitro transcription*

102 The transporter library screened in this study contains 600 full-length cDNAs encoding *Arabidopsis*  
103 membrane proteins (unpublished). The CDSs are in *Xenopus* expression vectors, either in pNB1u or in pOO2-  
104 GW vector.

105 Linear DNA templates for *in vitro* transcription were generated from pNB1u or pOO2-GW plasmid by PCR  
106 using Phusion High-Fidelity DNA Polymerase (NEB), according to the manufacturer's instructions. Primer pairs  
107 of HHN49 and HHN50 were used to generate templates from pNB1u plasmid (Wulff et al., 2019), whereas  
108 Bolar051 FW1 and Bolar051 RV2 pairs were used to PCR amplify from pOO2-GW plasmid (Larsen et al., 2017a)  
109 (Supplementary Table S1). PCR products were purified using the QIAquick PCR Purification Kits (Qiagen),  
110 according to the manufacturer's instructions. Capped cRNA was *in vitro* synthesized using the mMessage  
111 mMachiner T7 Kit (Ambion) following the manufacturer's instructions. Concentration of the synthesized cRNA  
112 of each transporter gene was normalized to 800 ng/ $\mu$ l.

### 113 2.2 *Expression in Xenopus oocytes*

114 Defolliculated *X. laevis* oocytes, stage V-VI, were purchased from Ecocyte Bioscience (Germany). Oocytes  
115 were injected with 50.6 nl cRNA using a Drummond NANOJECT II (Drummond scientific company, Broomall  
116 Pennsylvania). For the transporter library screening, cRNA of 8 genes were pooled (final concentration of 100  
117 ng/ $\mu$ l of each cRNA) and injected into oocytes. For single gene expression, ~250 ng/ $\mu$ l of cRNA was used for  
118 injection. Injected oocytes were incubated for 3 days at 16 °C in HEPES-based kulori buffer (90 mM NaCl, 1  
119 mM KCl, 1 mM MgCl<sub>2</sub>, 1 mM CaCl<sub>2</sub>, 5 mM HEPES pH 7.4) supplemented with gentamycin (100  $\mu$ g/mL). For  
120 non-expressing negative control oocytes (mock-injected control), 50.6 nl nuclease-free water (Ambion) was  
121 injected instead of cRNA.

### 122 2.3 *Transport assays in Xenopus oocytes*

123 Uptake assay in *X. laevis* oocytes was performed essentially as described previously (Jørgensen et al., 2017a),  
124 with some modifications. Three days after cRNA injection, oocytes were pre-incubated for 5 min in 5 ml MES-  
125 based kulori buffer (90 mM NaCl, 1 mM KCl, 1 mM MgCl<sub>2</sub>, 1 mM CaCl<sub>2</sub>, 5 mM MES pH 5.0), then incubated in  
126 0.5 ml MES-based kulori buffer (pH 5.0) containing a mixture of phlorizin (0.5 mM) and 4MTB (0.1 mM) for 1  
127 h. Oocytes were washed 3 times in kulori buffer (>20 ml) and homogenized with 50 % methanol (containing  
128 internal standard) and stored at -20 °C overnight. Subsequently, oocyte extracts were spun down at 10000 x  
129 g for 10 min at 4 °C, supernatants were transferred to new Eppendorf tubes and spun down at 10000 x g for  
130 10 min at 4 °C. The supernatant was diluted with water and filtered through a 0.22  $\mu$ m filter plate  
131 (MSGVN2250, Merck Millipore) and analyzed by LC-MS/MS as described below.

132 For export assay: 3 days after cRNA injection, oocytes were injected with 23 nl of 21.7 mM phlorizin or 4MTB  
133 (to obtain an initial internal concentration of ~0.5 mM) before a 5 min wait to reseal the hole (caused by the  
134 injection) before washing 3 times in kulori buffer (pH 7.4). Subsequently, some oocytes were harvested for T  
135 = 0 samples and the remaining oocytes were incubated in kulori buffer (pH 7.4) in a 96-well U-bottom

136 microtiter plate (Greiner Bio-One) (3 oocytes in a well containing 200  $\mu$ l buffer). Oocytes and the  
137 corresponding external medium were harvested at different time points over 22 h. The harvested oocytes  
138 were washed 3 times in kulori buffer (pH 7.4) and homogenized with 50 % methanol. 10  $\mu$ l of the external  
139 medium was sampled, homogenized with 50 % methanol, and then treated like the oocyte samples. The  
140 extraction and filtration through a 0.22  $\mu$ m filter plate were done as mentioned above. Finally, samples were  
141 analyzed by LC-MS/MS as described below. For both import and export assays, oocyte concentration of  
142 phlorizin and 4MTB was calculated based on an estimated cytosolic oocyte volume of 1  $\mu$ l (Jørgensen et al.,  
143 2015).

#### 144 2.4 Yeast strains, plasmids, and cloning

145 *S. cerevisiae* strain BG (*MAT $\alpha$  ho $\Delta$ 0 his3 $\Delta$ 0 leu2 $\Delta$ 0 ura3 $\Delta$ 0 cat5 $\Delta$ 0::CAT5(I91M) mip1 $\Delta$ 0::MIP1(A661T)*  
146 *gal2 $\Delta$ 0::GAL2 sal1 $\Delta$ 0::SAL1*) obtained from a previous study (Eichenberger et al., 2017) was used for all yeast  
147 experiments in this study. Precursor phloretin-producing platform strain DBR2 (in the BG background strain)  
148 was obtained from a previous study (Eichenberger et al., 2017). Strain DBR2 is based on plasmid (URA3 as a  
149 selection marker) expressing six genes (*AtPAL2*, *AmC4H*, *ScCPR1*, *At4CL2*, *HaCHS* and *ScTSC13*). Other yeast  
150 strains developed using BG as background strain are listed in Supplementary Table S2. Expression cassette  
151 plasmid backbone pEVE2176 carrying the *Pyrus communis* UDP-dependent-glycosyltransferase (UGT) gene  
152 *PcUGT88F2* was kindly provided by Evolva, Switzerland (Eichenberger et al., 2017).

153 Transporter genes *PUP8* and *PUP1* were expressed from the PGK1 promoter and ADH2 terminator. Coding  
154 DNA sequences (CDS) of *PUP8* and *PUP1* were USER fused with PGK1, ADH2 and homologous recombination  
155 tags (HRTs) (C and D tags) and cloned into pNB1u plasmid for *in vivo* homologous recombination assembly.  
156 USER fusion was done as described previously (Nour-Eldin et al., 2010), using primers shown in  
157 Supplementary Table S3. HRTs C and D were obtained by PCR amplification from pEVE2177 plasmid  
158 (Eichenberger et al., 2017). For empty vector control, a non-coding DNA sequence (1 kb bp) was used instead  
159 of the transporter genes. For the *PUP8* localization study, Venus was fused to the C-terminus of *PUP8* (*PUP8*-  
160 Venus). *PUP8-Venus* was USER fused together with PGK1, ADH2, C-tag and D-tag into pNB1u plasmid for *in*  
161 *vivo* homologous recombination assembly.

162 pNB1u vector carrying the different expression cassettes were assembled with pEVE2176 plasmid backbone  
163 (carrying *PcUGT88F2* flanked by B and C HRTs) into multi-expression plasmid (with HIS3 as selection marker)  
164 using *in vivo* homologous recombination, as described previously (Eichenberger et al., 2017). Helper plasmids  
165 carrying fragments required for replication, maintenance and selection, and HRTs required for the assembly,  
166 are shown in Supplementary Table S4. Plasmids constructed in this study are also shown in Supplementary  
167 Table S4. When UGT and *PUP8*/*PUP1*/non-coding sequence is introduced into phloretin pathway strain DBR2,  
168 the strain becomes PHZ\_*PUP8*, PHZ\_*PUP1*, or PHZ\_control phlorizin-producing strain, respectively.

#### 169 2.5 Media and yeast culture conditions

170 Unless stated otherwise, synthetic complete drop-out medium without uracil (SD-Ura), without histidine (SD-  
171 His) or without uracil and histidine (SD-Ura-His) supplemented with 2 % glucose was used to grow yeast cells  
172 for the yeast experiments in this study. SD medium chemicals were purchased from Sigma-Aldrich (St. Louis,

173 Missouri, USA) and medium was prepared according to the manufacturer's instructions. SD-Ura medium was  
174 prepared with 6.7 g/L yeast nitrogen base without amino acids, 1.92 g/L Yeast Synthetic Drop-out Medium  
175 Supplement without uracil and 20 g/L glucose. To prepare SD-Ura-His medium, 1.39 g/L Yeast Synthetic Drop-  
176 out Medium Supplement without uracil, histidine, leucine and tryptophan was used, and supplemented with  
177 76 mg/L tryptophan and 380 mg/L leucine.

## 178 *2.6 Phlorizin production and sample preparation*

179 For phlorizin production, EnPump200 substrate with enzyme reagent (Reagent A) (EnPresso GmbH,  
180 Germany) was used for slow release of glucose to simulate fed-batch conditions. Precultures were inoculated  
181 in 3 ml SD-Ura-His medium with 2 % glucose from a single colony in triplicates and incubated at 30 °C with  
182 shaking at 250 rpm for 24 h. Main cultures were inoculated in 50 ml SD-Ura-His with 60 g/L EnPump substrate  
183 (and 0.1 % Reagent A, glucose-releasing enzyme) as a carbon source in 250 ml shake flask. The initial OD<sub>600</sub>  
184 was 0.1. The flasks were incubated at 30 °C with shaking at 250 rpm for 120 h.

185 To analyze phlorizin production, 1 ml sample was harvested starting from 48 h after inoculation until 120 h,  
186 at an interval of 24 h. The culture OD<sub>600</sub> was measured and the sample was centrifuged in four replicates and  
187 supernatant was collected. Sinigrin glucosinolate was used as internal standard for quantification. The  
188 supernatant was filtered through a 0.22 µm filter plate (MSGVN2250, Merck Millipore) and then analyzed for  
189 extracellular phlorizin production by LC-MS/MS as described below.

## 190 *2.7 Phlorizin quantification by LC-MS/MS*

191 Oocyte or yeast samples were subjected to analysis by liquid chromatography coupled to mass spectrometry.  
192 Chromatography was performed on an Advance UHPLC system (Bruker, Bremen, Germany). Separation was  
193 achieved on a Kinetex 1.7u XB-C18 column (100 x 2.1 mm, 1.7 µm, 100 Å, Phenomenex, Torrance, CA, USA).  
194 Formic acid (0.05 %) in water and acetonitrile (supplied with 0.05 % formic acid) were employed as mobile  
195 phases A and B respectively. The elution profile was: 0-0.1 min, 5 % B; 0.1-1.0 min, 5-45 % B; 1.0-3.0 min 45-  
196 100 % B, 3.0-3.5 min 100 % B, 3.5-3.55 min, 100-5 % B and 3.55-4.7 min 5 % B. The mobile phase flow rate  
197 was 400 µl min<sup>-1</sup>. The column temperature was maintained at 40 °C. The liquid chromatography was coupled  
198 to an EVOQ Elite TripleQuad mass spectrometer (Bruker, Bremen, Germany) equipped with an electrospray  
199 ion source (ESI). The instrument parameters were optimized by infusion experiments with pure standards.  
200 The ion spray voltage was maintained at +5000 V and -3000 V, in positive and negative ion mode, respectively.  
201 Cone temperature was set to 350 °C and cone gas to 20 psi. Heated probe temperature was set to 250 °C and  
202 probe gas flow to 50 psi. Nebulizing gas was set to 60 psi and collision gas to 1.6 mTorr. Nitrogen was used  
203 as probe and nebulizing gas and argon as collision gas. Active exhaust was constantly on. Multiple reaction  
204 monitoring (MRM) was used to monitor analyte molecular ion → fragment ion transitions. Transition for  
205 phlorizin was optimized by direct infusion experiments into the MS source. Transitions for Sinigrin and 4MTB  
206 were previously reported (Crocoll et al., 2016). Detailed values for mass transitions can be found in  
207 Supplementary Table S5. Both Q1 and Q3 quadrupoles were maintained at unit resolution. Bruker MS  
208 Workstation software (Version 8.1.2, Bruker, Bremen, Germany) was used for data acquisition and  
209 processing. Linearity in ionization efficiencies were verified by analyzing dilution series.



## 210 **3. Results**

### 211 *3.1 Identification of phlorizin transporter*

212 An indexed full-length cDNA library of *Arabidopsis* transporters optimized for expression in *Xenopus* oocytes  
213 was previously used to identify the first glucosinolates transporters (GTR1 and GTR2) by screening pools  
214 consisting of 10 genes per pool for the uptake of glucosinolates in *Xenopus* oocytes (Nour-Eldin et al., 2012).  
215 The number of genes in this library was recently increased to 600 genes (unpublished). In this study, we  
216 screened this second-generation transporter library for phlorizin transport using LC-MS-based uptake assay  
217 in *Xenopus* oocytes (Jørgensen et al., 2017a).

218 The 600 genes were screened for phlorizin uptake in 75 pools, each containing equal amounts of 8 *in vitro*  
219 transcribed cRNAs. A minimum of ten pools (80 genes) was screened at a time in the same batch of oocytes.  
220 GTR1-expressing oocytes were included as batch-quality control, and the membrane-impermeable  
221 glucosinolate 4MTB (4-methylthiobutyl) was mixed with phlorizin in the uptake assays to control for  
222 membrane integrity of oocytes.

223 Oocytes expressing pool 45 accumulated 122 pmol of phlorizin, whereas oocytes expressing other pools of  
224 genes and mock-injected oocytes did not accumulate detectable levels of phlorizin (Figure 1A). Subsequently,  
225 pool 45 was split up into two subpools (4 genes in each) and assayed. Phlorizin transport activity was detected  
226 only in the second half of pool 45, and this sub-pool was deconvoluted by expressing and assaying each gene  
227 individually (Figure 1B and 1C). This identified AT4G18195 as a phlorizin transporter. AT4G18195 is a member  
228 of the purine permease (PUP) transporter family (Gillissen et al., 2000; Jelesko, 2012), and it has been  
229 annotated as AtPUP8 (Schwacke et al., 2003).



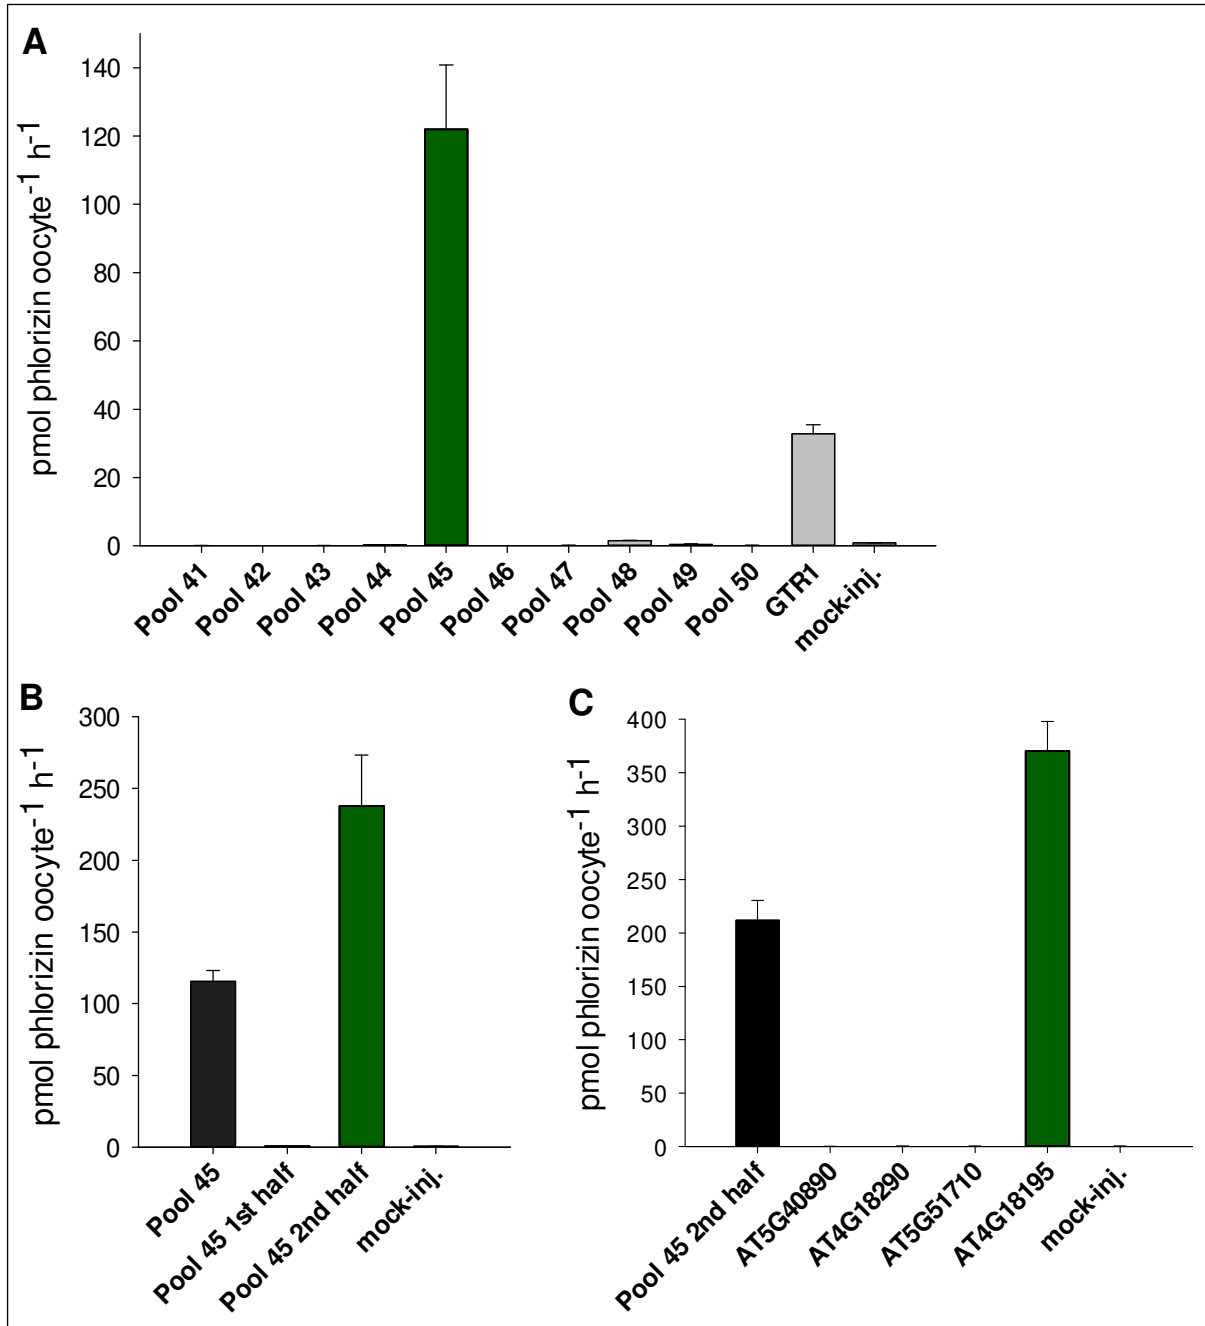

230

231 **Figure 1. Functional screening of *Arabidopsis* cDNA transporter library for phlorizin transport in *Xenopus***  
232 **oocytes.** A total of 600 genes were screened in pools of 8 genes per pool, 75 pools in total. Only 10 pools  
233 (from pool 41 to pool 50) are shown in this figure. (A) cRNA of 8 individually *in vitro* transcribed genes was  
234 pooled and expressed in 15 oocytes, and transport activity was measured in the presence of 0.5 mM phlorizin  
235 (pH 5.0). Phlorizin accumulation within oocytes was quantified using LC-MS/MS analysis. Error bars represent  
236  $\pm$  s.e. of mean,  $n = 3$  (3  $\times$  5 oocytes). (B) The positive phlorizin transporter pool, Pool 45, was split up into two  
237 subpools (Pool 45 1<sup>st</sup> half and Pool 45 2<sup>nd</sup> half); each subpool contains 4 genes. Subsequently, Pool 45 and  
238 the two subpools were expressed in oocytes and transport activity was measured in the presence of 0.5 mM  
239 phlorizin. Error bars represent  $\pm$  s.e. of mean,  $n = 4$  (4  $\times$  5 oocytes). (C) Deconvolution of Pool 45 2<sup>nd</sup>  
240 half to identify a phlorizin transporter. The positive subpool and the 4 genes were expressed individually in oocytes,

241 and transport activity was measured in the presence of 0.5 mM phlorizin (pH 5.0). Error bars represent  $\pm$  s.e.  
242 of mean, n = 3 (3 x 5 oocytes).

### 243 3.2 Biophysical Characterization of PUP8

244 PUP8 is a 394 amino acid protein with 10 predicted transmembrane spanning domains (Supplementary  
245 Figure S1). The PUP family in *Arabidopsis* consists of 21 genes but only PUP1 and PUP2 have been extensively  
246 characterized in heterologous systems and shown to transport ring-containing substrates such as the  
247 nucleobase adenine and specialized metabolites such as pyridoxine (vitamin B6) and cytokinins (Burkle et al.,  
248 2003; Gillissen et al., 2000; Jelesko, 2012; Szydlowski et al., 2013). PUP14 was recently shown to transport  
249 cytokinin when expressed in tobacco protoplasts (Zürcher et al., 2016). Additionally, PUP family members  
250 from tobacco (NtNUP1), rice (OsPUP7) and coffee (CcPUP1 and CcPUP5) have been shown to transport  
251 nicotine, cytokinins and adenine, respectively, when expressed in yeast (Hildreth et al., 2011; Kakegawa et  
252 al., 2019; Qi and Xiong, 2013). Thus, the transport activity of PUP8 towards dihydrochalcones ascribes a novel  
253 function to the PUP family.

#### 254 3.2.1. PUP8 is the only transporter in the family that transports phlorizin

255 Substrate specificity among closely related transporters are typically similar. Accordingly, within the PUP  
256 family, AtPUP1 and AtPUP2 can both transport adenine and cytokinins (Burkle et al., 2003; Gillissen et al.,  
257 2000). Hence, the identification of PUP8 suggested that other phlorizin transporters may exist in the PUP  
258 family. Of the 21 *Arabidopsis* members, 14 were already present in our transporter library. We cloned the  
259 remaining 7 PUPs into *Xenopus* oocyte expression vector (pNB1u) and tested the 21 PUPs individually for  
260 phlorizin transport activity in *Xenopus* oocytes. Only PUP8 showed phlorizin uptake, whereas the rest of the  
261 family, including two closely related homologs PUP7 and PUP21 (which share 76.4 % and 75.8 % amino acid  
262 identity with PUP8, respectively), did not show phlorizin uptake (Figure 2A and 2B).

263 To investigate whether the negative results for phlorizin transport were due to lack of expression of other  
264 PUP proteins in *Xenopus* oocytes, we tested some of the PUPs (PUP1, 8, 10, 11, 14 and 21) for adenine uptake.  
265 PUP1, PUP8, PUP10 and PUP11 transported adenine into oocytes, whereas PUP14 and PUP21 did not  
266 transport adenine (Supplementary Figure S2). This result indicates that PUP proteins are generally functional  
267 in oocytes and expands the list of verified adenine transporting PUPs from PUP1 and PUP2 to also include  
268 PUP8, 10 and 11. However, in the absence of activity for PUP21, we cannot conclude whether lack of phlorizin  
269 uptake by the close homologs of PUP8 is due to distinct substrate preference or alternatively non-functional  
270 expression. Based on these results, we focus on PUP8 in the remainder of this study.

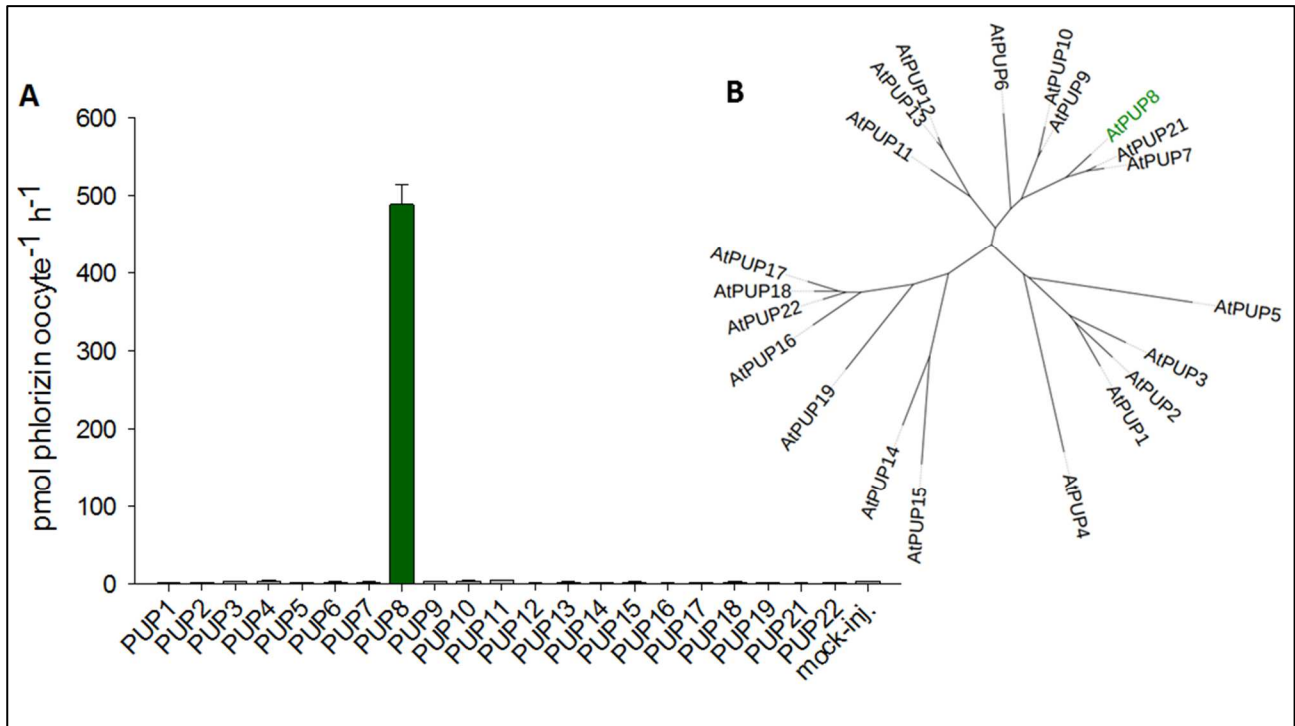

271

272

273

274

275

276

**Figure 2. Testing the *Arabidopsis* PUP family transporters for phlorizinin uptake in *Xenopus* oocytes. (A)** 21 AtPUPs were expressed individually in oocytes and transport activity was measured in the presence of 0.5 mM phlorizinin (pH 5.0). Phlorizinin accumulation within oocytes was quantified using LC-MS/MS analysis. Error bars represent  $\pm$  s.e. of mean,  $n = 3$  ( $3 \times 3$  oocytes). **(B)** Phylogenetic tree of the *Arabidopsis* PUP family. The tree was constructed by the neighbor-joining method. AtPUP8 is shown in green.

277

### 3.2.2. PUP8 does not transport phlorizinin against a concentration gradient

278

279

280

281

282

283

284

285

286

287

A number of PUP family members have so far been characterized as active secondary transporters that utilize the electrochemical proton gradient to drive transport of their substrates uphill against a concentration gradient (Burkle et al., 2003; Gillissen et al., 2000; Kakegawa et al., 2019; Szydłowski et al., 2013). Active transport is characterized by the transport of a substrate against its concentration gradient. To investigate whether PUP8 transports phlorizinin actively, we conducted a 3 h time-course uptake assay in PUP8-expressing oocytes and measured phlorizinin accumulation. We found that the transport activity was linear during the first 30 min, and then it saturated when intracellular phlorizinin concentration reached the extracellular phlorizinin concentration (Figure 3). This shows that PUP8 in oocytes cannot transport phlorizinin actively against a concentration gradient and thereby indicates that it functions as a facilitator that allows phlorizinin transport via a passive transport mechanism.

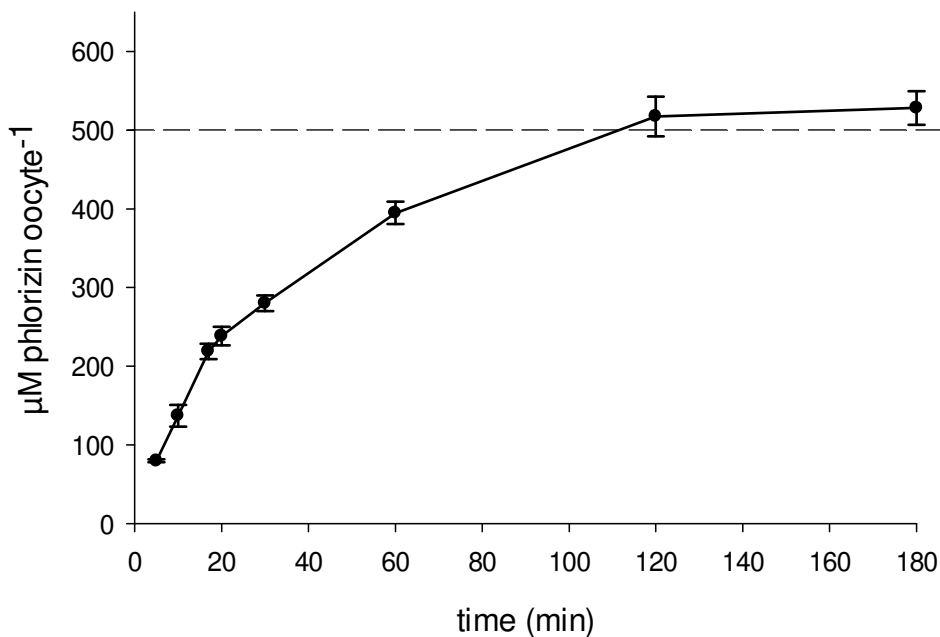

288

289 **Figure 3. A time-course uptake of phlorizin by PUP8 in *Xenopus* oocytes.** PUP8-expressing oocytes were  
290 incubated in kulori buffer containing 0.5 mM phlorizin (pH 5.0) for 8 different time points, ranging from 5  
291 min to 180 min. Phlorizin accumulation within oocytes was quantified using LC-MS/MS analysis and plotted  
292 against incubation time. Error bars represent  $\pm$  s.e. of mean,  $n = 5$  (5 x 3 oocytes). The dashed line indicates  
293 the phlorizin concentration in the external medium.

### 294 3.2.3. Is phlorizin transport by PUP8 dependent on a proton gradient?

295 A passive transport mechanism implies that PUP8—in contrast to PUP1 (Gillissen et al., 2000; Szydłowski et  
296 al., 2013)—transports phlorizin without coupling to proton movement. To investigate this, we tested uptake  
297 in oocytes at different extracellular pH (4.5 – 7.5). Phlorizin uptake by PUP8 was not significantly changed  
298 when the extracellular pH was increased from 4.5 to 5.5 and 6.5 (Figure 4A). The transport activity was slightly  
299 decreased at pH 7.5 by 28 % (compared to pH 5.5). To further investigate the dependency of PUP8 on a  
300 proton gradient, a phlorizin uptake was tested in the presence or absence of the proton uncoupler CCCP  
301 (carbonyl cyanide *m*-chlorophenyl-hydrazine). We included a known proton-symporter—GTR1—as a  
302 positive control of proton-coupled transport. The addition of CCCP (100  $\mu$ M) decreased GTR1 transport  
303 activity by 84 % (from 713 to 111 pmol 4MTB/oocyte) (Figure 4C), whereas the phlorizin transport by PUP8  
304 was decreased only by 29 % (from 542 to 383 pmol/oocyte) (Figure 4B). Finally, we investigated directly  
305 whether PUP8-mediated phlorizin transport is coupled to the movement of protons by subjecting PUP8-  
306 expressing oocytes to two-electrode voltage-clamp (TEVC) electrophysiological measurements. Since  
307 phlorizin is non-charged, co-transport with even a single proton would induce a negative current in the TEVC

308 measurements. However, phlorizin transport by PUP8 did not induce any negative currents that could  
309 correspond with proton-cotransport (Supplementary Figure S3A and B).

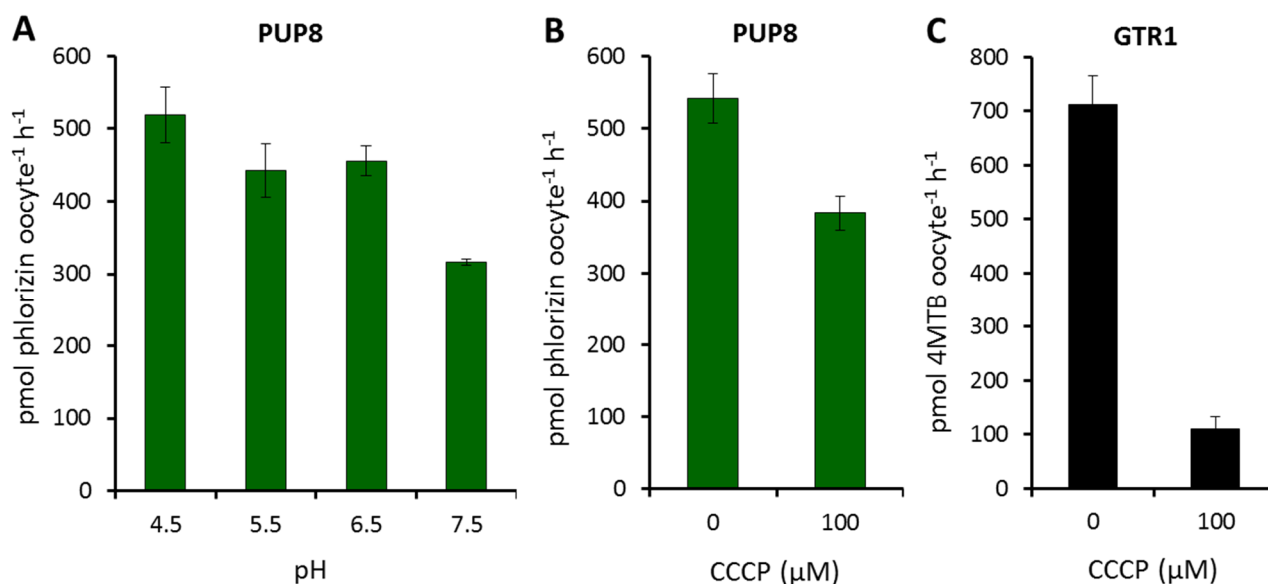

310

311 **Figure 4. Effect of extracellular proton concentration on PUP8-mediated phlorizin transport in *Xenopus***  
312 **oocytes. (A)** Phlorizin transport by PUP8 at different extracellular pH. PUP8-expressing oocytes were  
313 incubated in 0.5 mM phlorizin containing buffer at four different pH (4.5, 5.5, 6.5 and 7.5) for 1 h. Phlorizin  
314 accumulation within oocytes was quantified using LC-MS/MS analysis. Error bars represent ± s.d. of mean, n  
315 = 4 - 5 (4 - 5 x 3 oocytes). Effect of CCCP on PUP8-mediated phlorizin uptake (B) or GTR1-mediated 4MTB  
316 uptake (C). PUP8 and GTR1-expressing oocytes were incubated in 0.5 mM phlorizin and 0.1 mM 4MTB  
317 containing kulori buffer (pH 5.0) respectively, in the presence or absence of 0.1 mM CCCP for 1 h. Phlorizin  
318 and 4MTB accumulated within the oocytes were quantified using LC-MS/MS analysis. Error bars represent ±  
319 s.d. of mean, n = 3 - 4 (3 - 4 x 3 oocytes).

#### 320 3.2.4. Determining transport kinetics of phlorizin transport of PUP8

321 Kinetic characterization was performed to estimate the  $K_m$  of PUP8-mediated phlorizin transport in *Xenopus*  
322 oocytes. We chose 15 min assay for kinetic characterization of PUP8-mediated phlorizin uptake at increasing  
323 phlorizin concentrations at pH 5. At 15 min PUP8 mediated phlorizin uptake was linear and assumed to  
324 represent initial transport rates (Figure 3). The data were fitted to the Michaelis-Menten equation, which  
325 estimated a  $K_m$  value for phlorizin uptake by PUP8 to  $296 \pm 39 \mu\text{M}$  (Figure 5). As phlorizin transport by PUP8  
326 was not electrogenic, all our characterizations were performed via LC-MS/MS-based transport assays. Such  
327 cumulative transport assays mean that the kinetic characterization is not obtained using true initial transport  
328 rates. However, by choosing an assay time within the linear range, we believe that the affinity is estimated  
329 to the best of the current technical capability.

330

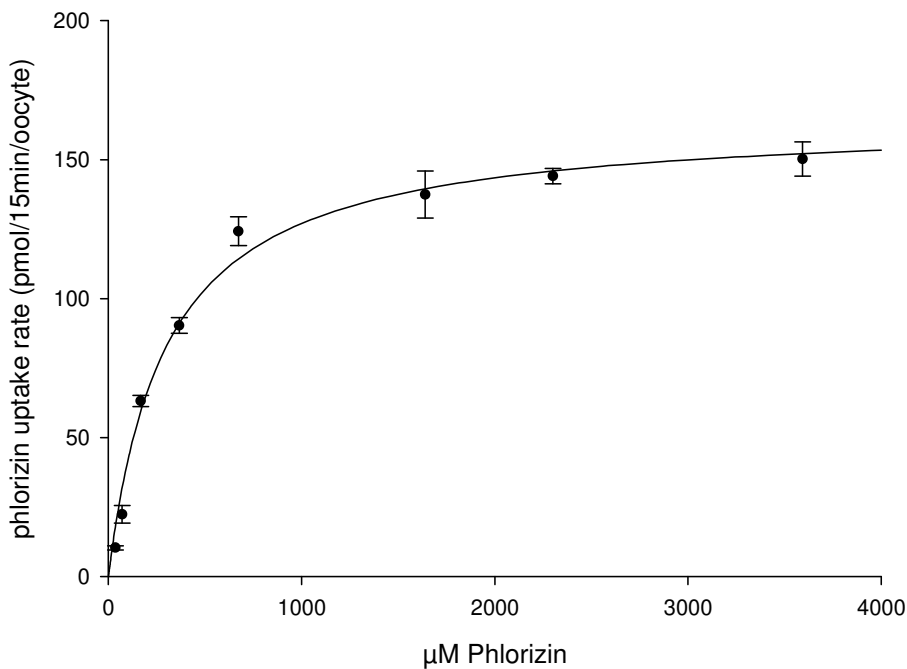

331

332 **Figure 5.** Kinetic characterization of PUP8-mediated phlorizin transport. PUP8-expressing oocytes were  
333 assayed at 8 different phlorizin concentrations for 15 min at pH 5.0. The data were fitted to the Michaelis-  
334 Menten equation. Phlorizin accumulation within oocytes was quantified using LC-MS/MS analysis. Error bars  
335 represent  $\pm$  s.e. of mean,  $n = 4$  (4 x 3 oocytes).

### 336 3.2.5. Directionality of phlorizin transport of PUP8

337 The apparent passive transport mechanism of PUP8 suggested that it is a facilitator that could accommodate  
338 bidirectional phlorizin transport. To test whether PUP8 can also export phlorizin, we performed phlorizin  
339 injection-based export assay in *Xenopus* oocytes. We measured phlorizin efflux from phlorizin-injected  
340 oocytes over time, by quantifying both intracellular and extracellular phlorizin content. The injected  
341 intracellular phlorizin amount decreased significantly over time in PUP8-expressing oocytes, and  
342 simultaneously the amount of phlorizin in the extracellular solution increased (Figure 6). 14 h after phlorizin  
343 injection, PUP8-expressing oocytes had exported 65 % of the injected phlorizin. By 22 h, 75 % of the injected  
344 phlorizin had been exported (Figure 6). In contrast, mock-injected oocytes did not display significant phlorizin  
345 efflux. To rule out that the export was an artifact induced by expression of a heterologous transporter, PUP1  
346 (which functions in oocytes as an adenine transporter, Supplementary Figure S2) was tested and showed a  
347 pattern similar to the mock-injected oocytes (Figure 6). Furthermore, we verified that phlorizin export in  
348 PUP8-expressing oocytes was specific to phlorizin as 4MTB was not exported from PUP8-expressing oocytes  
349 (Supplementary Figure S4). These results indicate that PUP8 is capable of mediating both phlorizin import

350 and export. The direction of net transport likely depends on the phlorizin concentration gradient, which is  
351 consistent with a uniport transport mechanism.

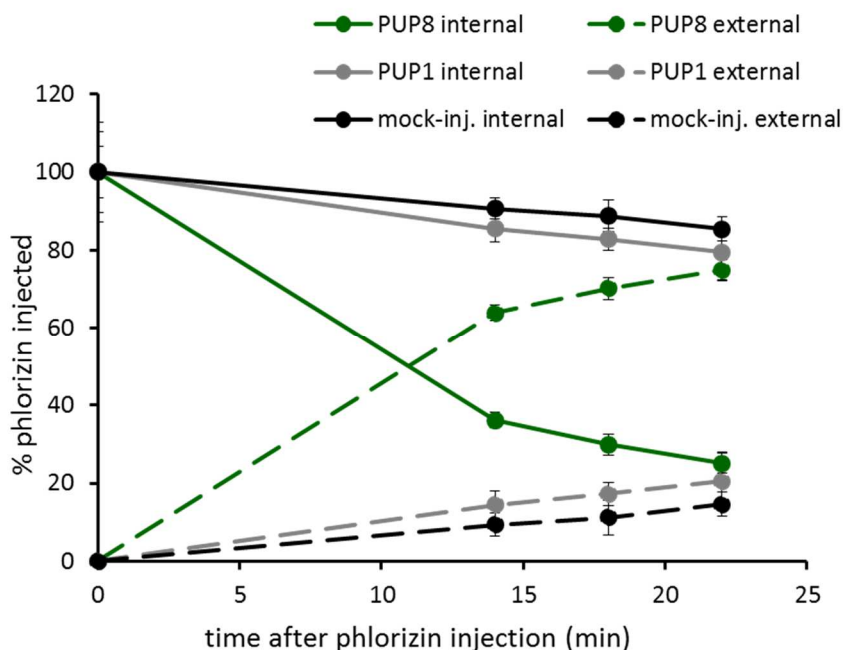

352

353 **Figure 6. Injection-based export assay of phlorizin by PUP8 in *Xenopus* oocytes.** Oocytes expressing PUP8,  
354 PUP1, or mock-injected oocytes were injected with phlorizin (to obtain initial internal concentration ~0.5  
355 mM) and incubated in a kulori buffer (pH 7.4, without phlorizin). Export transport activity was measured by  
356 quantifying intracellular and extracellular phlorizin content, after 14, 18 and 22 h of incubation, using LC-  
357 MS/MS analysis. Error bars represent  $\pm$  s.d. of mean of % phlorizin injected, n = 5 (5 x 3 oocytes).

### 358 3.3 Subcellular localization and functional expression of PUP8 in yeast

359 PUP8 was identified and hitherto characterized in *Xenopus* oocytes. A number of PUP family members have  
360 previously been functionally characterized in yeast (Burkle et al., 2003; Gillissen et al., 2000; Kakegawa et al.,  
361 2019; Qi and Xiong, 2013), suggesting that they are correctly localized in the plasma membrane. However, a  
362 subcellular localization study of the tobacco PUP family nicotine transporter NtNUP1 shows that it is not only  
363 localized to the plasma membrane, but also to endomembranes (Kato et al., 2015). Thus, before we  
364 proceeded to express PUP8 in the phlorizin-producing yeast strain, we sought to verify the subcellular  
365 localization of PUP8 in *S. cerevisiae*.

366 We first studied the expression and localization of PUP8 in yeast by translationally fusing Venus to the C-  
367 terminus of PUP8 (PUP8-Venus) and analyzing by confocal microscopy. PUP8-Venus localized predominantly  
368 to the plasma membrane and endomembrane, likely the tonoplast (Figure 7A). Next, we tested the



369 functionality of PUP8 in yeast; we performed phlorizin uptake assay by incubating yeast cells expressing  
370 either PUP8 or empty vector (control) in a buffer containing 0.5 mM phlorizin for 30 min, and phlorizin  
371 accumulation in yeast cells was quantified using LC-MS/MS analysis. PUP8-expressing yeast cells accumulated  
372 a considerable amount of phlorizin (644 pmol/O.D/ml), whereas the control cells accumulated low  
373 background levels (Figure 7C). These results demonstrated that PUP8 is functionally expressed in yeast's  
374 plasma membrane. However, due to the signals at what appears to be the tonoplast (Figure 7A), we cannot  
375 exclude that PUP8 may also facilitate transport of phlorizin across intracellular endomembranes.

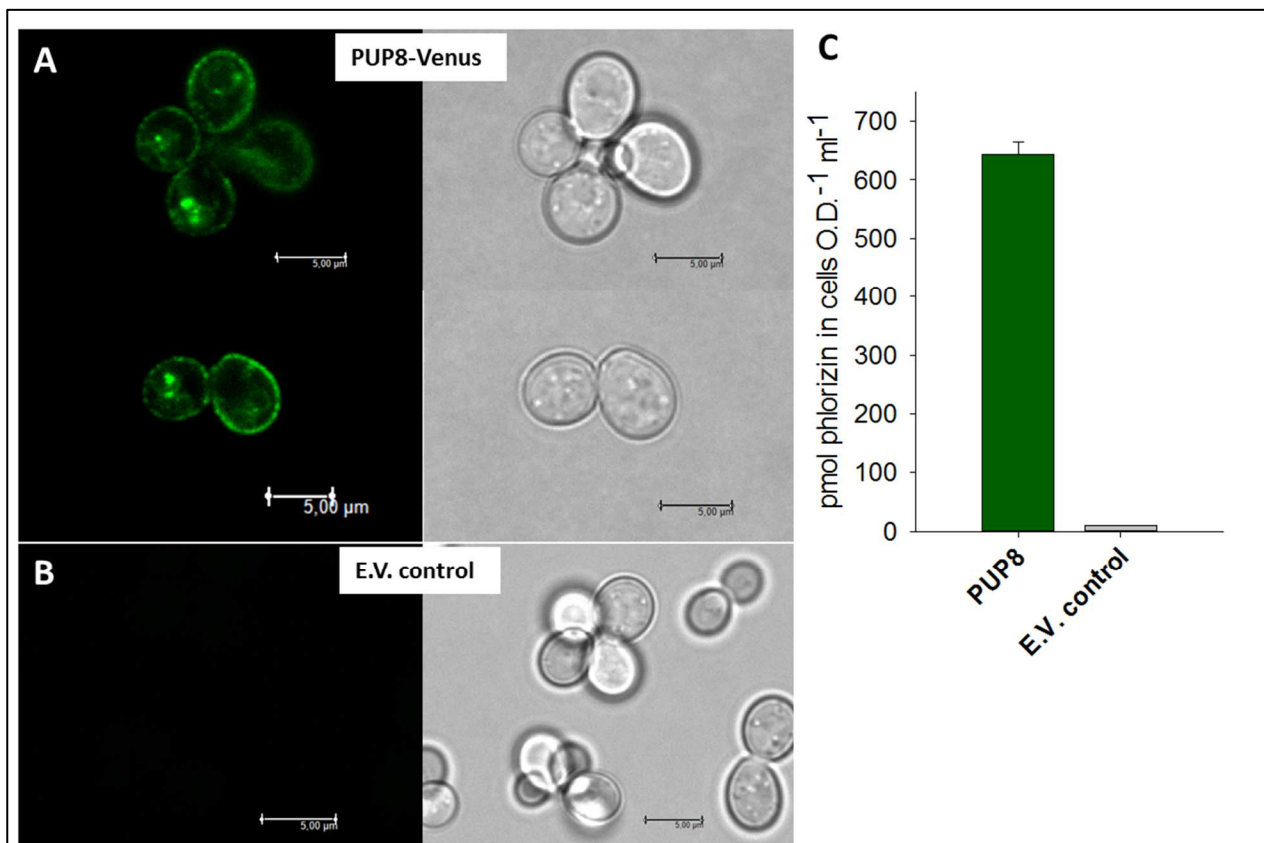

376

377 **Figure 7. Subcellular localization of PUP8 and its phlorizin transport in *S. cerevisiae*.** PUP8-Venus fusion  
378 protein was expressed in yeast under the control of the *S. cerevisiae* PGK1 promoter (A). Empty vector control  
379 without Venus expressions was used as a negative control (B). After overnight growth in SD-His medium (2  
380 % glucose), cells were analyzed by confocal microscopy (Leica SP5-X). The left image was taken under Venus  
381 excitation light; the corresponding bright-field image is presented on the right side. All the scale bars  
382 represent 5 μm. (C) Phlorizin uptake assay in *S. cerevisiae*. Yeast cells expressing PUP8 or empty vector (E.V.)  
383 control were incubated in a phosphate buffer (0.1 M HK<sub>2</sub>PO<sub>4</sub>, pH 5.0) containing 0.5 mM phlorizin for 30 min.  
384 Following washing the pellet twice, phlorizin accumulation within the yeast cells was quantified using LC-  
385 MS/MS analysis. Error bars represent ± s.d. of mean, n = 4 (4 x 3 transformants).

386

387 *3.4 Expression of PUP8 increased phlorizin production in S. cerevisiae*

388 The phlorizin-producing strain PHZ3, described by Eichenberger et al. (2017), comprises a set of two HRT  
389 plasmids, the first of which carries the phloretin pathway consisting of six genes (as in DBR2), whereas the  
390 UGT gene (PcUGT88F2) is expressed from a second plasmid. To investigate whether the expression of PUP8  
391 increases phlorizin production, we expressed PUP8 and PcUGT88F2 on the second HRT plasmid in strain  
392 DBR2, making strain PHZ\_PUP8. For negative control, the CDS of PUP8 was replaced by a non-coding  
393 sequence and then expressed in strain DBR2, making strain PHZ\_control. The strains were cultured in a  
394 simulated fed-batch medium in shake flasks and the extracellular phlorizin production was quantified by LC-  
395 MS/MS.

396 The PHZ\_PUP8 strain produced significantly higher extracellular levels of phlorizin than the negative control  
397 strain PHZ\_control at all time points (Figure 8A). After 96 h of fermentation, the PHZ\_PUP8 strain produced  
398  $75 \pm 4$  mg/L extracellular phlorizin, which is 83 % higher than the control strain (41 mg/L). To exclude the  
399 possibility that the increased phlorizin titer in PHZ\_PUP8 strain was due to improved adenine import or an  
400 artifact induced by the expression of purine permease protein rather than facilitated phlorizin export, we  
401 expressed the adenine transporter PUP1 (PHZ\_PUP1) and analyzed phlorizin production. Expressing PUP1  
402 did not improve the phlorizin production (Figure 8A). From the time-dependent phlorizin production assay,  
403 the optimum production appeared to be at 96 h. To account for potential effects on growth, we normalized  
404 the phlorizin titer to the optical density. At 96 h, expression of PUP8 resulted in a 79 % increase in phlorizin  
405 specific yield (mg/L/OD) as compared to the control strains (Figure 8B). We also showed that external  
406 application of phloretin or phlorizin, at concentrations at least 3-fold higher than the production level of the  
407 strains, did not affect the yeast growth (data not shown).

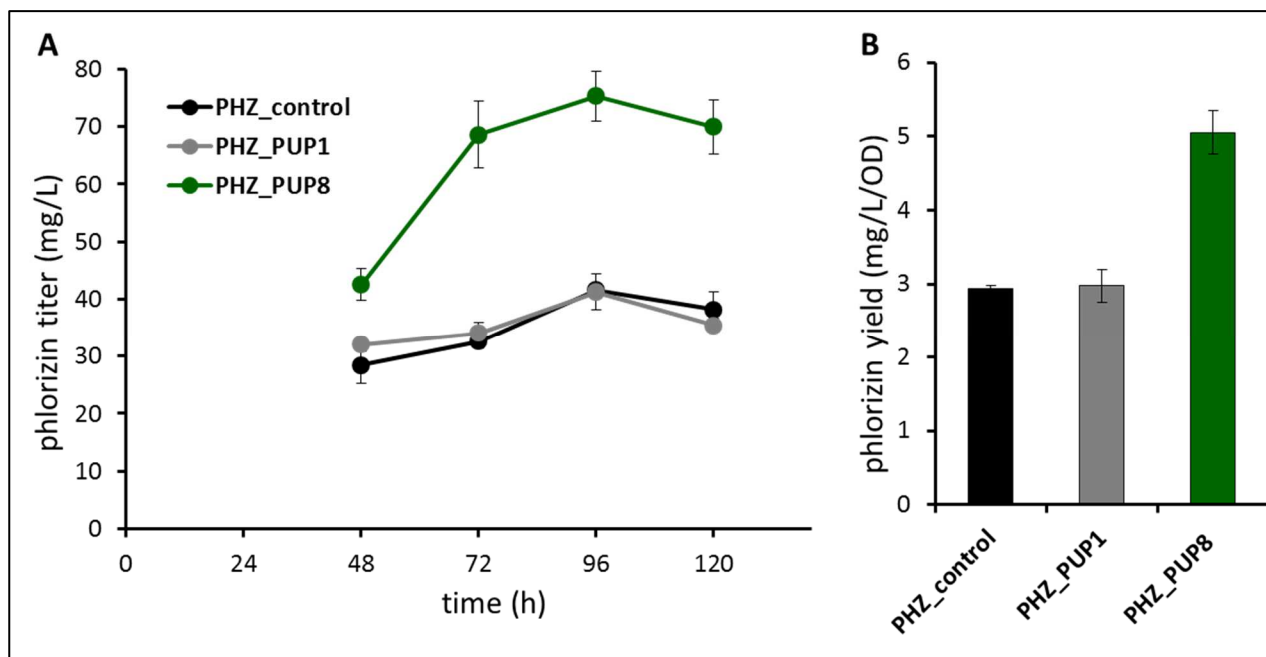

408

409 **Figure 8. Effect of PUP8 expression on phlorizin production in *S. cerevisiae*.** Phlorizin-producing yeast strains  
410 expressing PUP8 (PHZ\_PUP8), PUP1 (PHZ\_PUP1) or empty vector control (PHZ\_control) were cultivated in  
411 SD-Ura-His medium with 60 g/L EnPump substrate (with 0.1 % enzyme reagent) for slow glucose release to  
412 simulate fed-batch conditions in shake flasks. Subsequently, samples were harvested at 48, 72, 96 and 120 h  
413 after inoculation, and external phlorizin production was quantified using LC-MS/MS analysis. Time-  
414 dependent phlorizin titer (mg/l) (A), and phlorizin specific yield at 96 h after inoculation (B) are shown. Error  
415 bars represent  $\pm$  s.d. of mean, n = 4.

## 416 Discussion

417 Transport-engineering represents an emerging technology for increasing production in bioengineering  
418 through improving substrate supply or by facilitating efflux of the final product into the growth medium  
419 (Boyarskiy and Tullman-Ercek, 2015; Nour-Eldin and Halkier, 2013). To realize the potential of transport-  
420 engineering, we addressed the need to exploit the vast repository of plant transporters of specialized  
421 metabolites and to study their effects on yield through case studies (Borodina, 2019; Larsen et al., 2017b).  
422 As a first step, we establish unbiased brute-force screening of plant transporter libraries in *Xenopus* oocytes  
423 as a viable approach for identifying plant transporters for bioengineering purposes. Hence, it is timely to  
424 discuss how the experiences made in this study will shape future screening endeavors.

### 425 Library design – continued screening of *Arabidopsis* library and in parallel build targeted hotspot library

426 A pertinent question is whether to invest time and labor into building new transportome-wide species-  
427 specific transporter libraries for future identification of transporters of novel compounds. The large ABC

428 transporter family has long been known to encode detoxifying transporters capable of exporting a wide range  
429 of xenobiotics (Kang et al., 2011) and recently, members from the NPF was shown to transport specialized  
430 plant metabolites with highly varying chemical structures (Jørgensen et al., 2017b; Larsen et al., 2017a; Nour-  
431 Eldin et al., 2012). Similarly, the substrate spectrum of the PUP family was recently expanded from purine  
432 nucleobase substrates (Gillissen et al., 2000) to include plant specialized metabolites such as pyridoxine,  
433 nicotine, benzyloquinoline alkaloids and now phlorizin (Dastmalchi et al., 2019; Jelesko, 2012; Kato et al.,  
434 2015; Szydowski et al., 2013). The large disparity in chemical structure between these substrates indicates  
435 that the substrate spectrum of plant transporter families may be very large. Accordingly, we find it  
436 worthwhile to screen the already-established *Arabidopsis* library (600 transporter genes) for activity towards  
437 future target compounds. As shown in this study, rapid screening of this library may identify a transporter  
438 that can serve the immediate needs of ongoing bioengineering projects and holds potential for identifying  
439 additional transporter families with substrate specificity towards specialized metabolites. In parallel, smaller  
440 dedicated libraries should be built from plants producing the target compounds. These libraries should  
441 consist of hotspot families known to encode transporters of specialized plant metabolites and that express  
442 well in *Xenopus* oocytes (such as the NPF and the PUP families). We believe that these transport libraries will  
443 form a strong foundation for future transporter identification for synthetic biology purposes.

#### 444 **Assay design – using import assays for identifying exporters**

445 Exporters, crucial for efficient secretion of final products, are particularly challenging to screen for directly in  
446 any model system. *Xenopus* oocytes provide a unique advantage as target substrates can be delivered to the  
447 cytosol via injection. For high-throughput screening of large transporter libraries, the need for an extra  
448 injection is labor intensive and imposes a sustained—hard-to-fulfill—requirement for oocytes of high  
449 robustness. Additionally, when characterizing the directionality of PUP8, we detected PUP8 mediated  
450 phlorizin export only after 14 h past compound injection (Figure 6). In comparison, some compounds such as  
451 sucrose export by SWEET transporters was detected already after 5 minutes of substrate injection (Chen et  
452 al., 2010, 2012; Lin et al., 2014). This difference in assay-time before export could be detected indicates that  
453 the time required for intracellular movement of injected substrates to the membrane for transporter-  
454 mediated export may vary in a substrate-dependent manner. After 48 h, PUP8-expressing and mock-injected  
455 oocytes had both exported almost all injected phlorizin (data not shown). Thus, long-term endpoint assays  
456 may be unsuitable due to potential endogenous export activity. This unpredictability in assay-time imposes  
457 the need to monitor export using laborious time-course assays, which further complicates library screening  
458 for exporters using injection-based export assay.

459 Instead, we identified PUP8 via a straightforward uptake-based screen and then demonstrated

460 bidirectionality by injecting phlorizin in PUP8-expressing oocytes and detecting PUP8-dependent  
461 extracellular phlorizin accumulation over time. This aligns well with the elegant uptake-assay used to identify  
462 the long-sought SWEET sucrose exporters (Chen et al., 2010). Similarly, the characterization of the H<sup>+</sup>-coupled  
463 ZmSUT1 sucrose transporter showed that the sucrose-coupled proton current was reversible and depended  
464 on the direction of the sucrose and pH gradient as well as the membrane potential across the transporter  
465 (Carpaneto et al., 2005). However, we do not expect that uptake-based assays are suitable for all types of  
466 transporters. For example, eukaryotic ABC transporters have long been accepted to act exclusively as  
467 exporters (Kang et al., 2011). Therefore, for ABC transporters it may be necessary to build dedicated sub-  
468 libraries that can be screened via the injection-based time-course export assays. Thus, when searching among  
469 secondary transporters (carriers) for export activity it is possible to use straightforward uptake assays and  
470 then investigate whether they possess bidirectionality.

#### 471 ***Xenopus* oocytes as expression host – best in the class but not necessarily perfect?**

472 The fact that we could express and detect adenine uptake for four different PUP members (Supplementary  
473 Figure S2) indicated that *Xenopus* oocytes are generally able to express, fold and target PUP members  
474 functionally to the plasma membrane. However, it was expected that PUP8's close homologs (PUP7 and  
475 PUP21, 76.4 % and 75.8 % amino acid identity, respectively) would also exert detectable phlorizin transport.  
476 However, despite their homology to PUP8, PUP7 and PUP21 remain as orphan transporters with no  
477 experimentally verified substrate. On the other hand, PUP8 appears to possess dual substrate specificity  
478 towards phlorizin and adenine (Figure 1C and Supplementary Figure S2). In this context, it is noteworthy that  
479 PUP14 was previously shown to mediate cytokinin (trans-zeatin) uptake when expressed in protoplasts from  
480 *Nicotiana benthamiana* (Zürcher et al., 2016). Here, PUP14 injected oocytes did not transport adenine  
481 (Supplementary Figure S2), which is otherwise a substrate for cytokinin-transporting PUPs (Burkle et al.,  
482 2003; Gillissen et al., 2000). Nor could we detect cytokinin (trans-zeatin) uptake for PUP14 when expressed  
483 in *Xenopus* oocytes (data not shown). This non-functional expression of PUP members with known (or  
484 expected) substrates could be due to a number of reasons, for example, lack of co-factor(s) or interacting  
485 partners or that the transporters require activation through posttranslational modification in the *Xenopus*  
486 oocyte system. Despite *Xenopus* oocytes representing an extremely well-established system for expressing  
487 and characterizing transport proteins, there is room for further optimization. For example, obtaining  
488 functional expression of PUP14 in *Xenopus* oocytes represents an interesting case study that may reveal  
489 important alterations that may find generic applicability when expressing other PUP members.

#### 490 **Increasing phlorizin production in yeast through transport-engineering**

491 As one of the prerequisites for cost-efficient heterologous production of valuable small molecules, a  
492 microbial chassis is required to export final products to the external growth medium. This enables facile  
493 product recovery without the need for costly purification from cell homogenate. Moreover, efficient export  
494 can alleviate potential feedback inhibition and auto-toxicity, which otherwise may hamper yield. An open  
495 question is at which point in a bioengineering endeavor it would be beneficial to introduce a transporter to  
496 improve secretion if at all.

497 Phlorizin is a hydrophilic compound that requires transport proteins to traverse membrane bilayers. By  
498 collecting external growth medium, we showed that the phlorizin-producing yeast strain used in this study  
499 secretes phlorizin through endogenous transporters (Figure 8). Previous studies have shown that production  
500 levels of target compounds can be increased by improving endogenous transport activities (Fisher et al.,  
501 2014; Foo and Leong, 2013). Accordingly, introducing a heterologous plant transporter represents another  
502 means to improve export of microbial cell factories with potential for increased yield. Indeed, PUP8  
503 expression significantly increased phlorizin production as compared to the control strains (Figure 8A).  
504 However, given the dual substrate specificity of PUP8 (adenine and phlorizin) (Figure 1C and Supplementary  
505 Figure S2), we asked whether this increase could be an indirect effect of increased adenine transport activity.  
506 Adenine supply is a principal component of yeast extract media that affects recombinant protein production  
507 (Zhang et al., 2003). As a control, we show that PUP1 transports adenine but not phlorizin in both *Xenopus*  
508 oocytes and yeast. The inability of PUP1 to increase phlorizin production in the phlorizin producing yeast  
509 strain (Figure 8) indicates that PUP8-mediated phlorizin export is the direct cause for increased phlorizin  
510 production. As a case study on implementing plant transporters in bioengineering, this positive outcome  
511 prompted us to consider the underlying causes for this yield increase.

### 512 **Phlorizin producing yeast strain may be subject to feedback inhibition**

513 Phlorizin is a known competitive inhibitor of mammalian sodium-coupled SGLT glucose transporters and its  
514 aglycone phloretin inhibits the mammalian GLUT transporters (Ehrenkranz et al., 2005). However, the 17 HXT  
515 glucose transporters in *Saccharomyces cerevisiae* are neither inhibited by phlorizin nor phloretin (Kasahara  
516 et al., 2009). Thus, it is unlikely that the yield increase is correlated with any modulation of sugar transport  
517 activity in yeast.

518 Phlorizin appears to have few cytotoxic effects whereas the penultimate product, the aglycone phloretin is  
519 an uncoupler and inhibitor of mitochondrial oxidative phosphorylation (De Jonge et al., 1983). Introduction  
520 of the UGT from pear (PcUGT88F2) into the phloretin producing strain reduced phloretin levels by a factor of  
521 ~5, but not all phloretin is converted to phlorizin by the UGT (Eichenberger et al., 2017). Thus, it is possible

522 that the remaining phloretin could hamper cell growth. Via a growth curve experiment, we showed that  
523 extracellular application of phloretin or phlorizin (0.5 mM) did not affect the growth of yeast cells (data not  
524 shown). This indicates that the increased in phlorizin production by PUP8 is not through alleviating phloretin  
525 or phlorizin mediated toxicity. This conclusion is supported by the normalized increase in phlorizin production  
526 to OD showing little effect on yeast growth.

527 Increased phlorizin production could rather be due to alleviated feedback inhibition of biosynthetic  
528 enzyme(s). It is noteworthy that the enzymatic activities of general phenylpropanoid and flavonoid  
529 biosynthesis pathways are regulated by pathway intermediates (Yin et al., 2012). In particular, the enzymatic  
530 activity of phenylalanine ammonia-lyase (PAL), the first committed step in the phlorizin biosynthesis, appears  
531 sensitive to even very low levels of non-glycosylated flavonols, which are believed to transmit repression by  
532 direct inhibition or by inducing secondary suppressive modifications (Yin et al., 2012). Early phlorizin pathway  
533 intermediates, such as cinnamic acid and p-Coumaric acid, have also been reported to feedback control the  
534 PAL activity (Blount et al., 2000; Lam et al., 2008; Sarma and Sharma, 1999). Moreover, phlorizin analogs  
535 (canagliflozin and dapagliflozin) have been reported to be potent inhibitors of human UGTs (Pattanawongsa  
536 et al., 2015). To our knowledge, phloretin and phlorizin mediated feedback inhibition of biosynthetic enzymes  
537 have not yet been demonstrated. But, based on the observations presented above it appears that PUP8  
538 mediated export of phlorizin into the growth medium is key for alleviating feedback inhibition leading to  
539 increased enzymatic activity.

540 Thus, in this case study we show the introduction of heterologous bidirectional phlorizin transport activity  
541 significantly improved production from a non-optimized pathway in a microbial chassis that secretes the  
542 target compound by endogenous transporters. In the context of bioengineering, it may thus be worthwhile  
543 to search for transporters of final products early on in parallel with establishing the biosynthesis pathway.

544 Moreover, we believe that the findings presented in this study raise a number of interesting questions. For  
545 example, we claim that introducing heterologous transporters in most transport-engineering papers have  
546 focused on improving ABC transporters, phlorizin transporters with different transport mechanisms would  
547 provide insights into which transport properties are desirable. It will be interesting to study whether a  
548 synergistic improvement in yield would be observed if PUP8 was introduced in a yeast strain where  
549 biosynthesis pathway has been optimized.

550 In conclusion, we screened a large *Arabidopsis* full-length cDNA library in *Xenopus* oocytes and identified and  
551 characterized the plant transporter PUP8, capable of transporting the anti-diabetic compound phlorizin  
552 across plasma membranes in a heterologous host. PUP8 was the only transporter in this family that could



553 transport phlorizin in *Xenopus* oocytes. PUP8 transported phlorizin bidirectionally, depending on the  
554 concentration gradient in *Xenopus* oocytes. We show that PUP8 is a medium-affinity phlorizin uniporter that  
555 can transport phlorizin independent of a pH-gradient. PUP8 expression improved phlorizin titer by 83 %, most  
556 likely through facilitating product secretion and thereby accelerating the forward reaction of the pathway by  
557 creating a sink for the product. The identification of the *Arabidopsis* transporter PUP8 for the exogenous  
558 metabolite phlorizin through cDNA library screening shows that such transporter libraries can be screened  
559 to identify transporters for other metabolites of interest. This may help overcome the challenge of identifying  
560 transporters for the purpose of future transport-engineering in synthetic biology. In the context of providing  
561 transporters for transport-engineering purposes, this study shows that plants encode a treasure cove of  
562 transporters with unexpected substrate specificities that can be mined efficiently for activity towards high-  
563 value natural products.

564

## 565 **Conflict of interest**

566 The authors declare no conflict of interest.

567

## 568 **Acknowledgments**

569 We acknowledge the financial support from the Innovation Fund Denmark (grant 76-2014-3 to ZMB) and the  
570 Danish National Research Foundation (grant DNRF99 to CC and HN). IM-H and IB acknowledge the financial  
571 support from the Novo Nordisk Foundation (Grant Agreement NNF10CC1016517) and from the European  
572 Research Council under the European Union's Horizon 2020 Research and Innovation Programme (YEAST-  
573 TRANS Project, Grant Agreement 757384). The authors would like Louise Svenningsen for technical assistance  
574 in the laboratory, Carole Duchêne for assisting in subcloning some PUP genes and Michael Hansen for  
575 assisting in confocal microscope imaging. We would also like to thank Evolva SA for making a yeast strain and  
576 phlorizin pathway plasmids available for this work.

## 577 References

- 578 Blount, J.W., Korth, K.L., Masoud, S.A., Rasmussen, S., Lamb, C., Dixon, R.A., 2000. Altering expression of  
579 cinnamic acid 4-hydroxylase in transgenic plants provides evidence for a feedback loop at the entry  
580 point into the phenylpropanoid pathway, *Plant Physiology*. <https://doi.org/10.1104/pp.122.1.107>
- 581 Borodina, I., 2019. Understanding metabolite transport gives an upper hand in strain development. *Microb.*  
582 *Biotechnol.* 12, 69–70. <https://doi.org/10.1111/1751-7915.13347>
- 583 Boyarskiy, S., Tullman-Ercek, D., 2015. Getting pumped: membrane efflux transporters for enhanced  
584 biomolecule production. *Curr. Opin. Chem. Biol.* 28, 15–19.  
585 <https://doi.org/10.1016/J.CBPA.2015.05.019>
- 586 Burkle, L., Cedzich, A., Dopke, C., Stransky, H., Okumoto, S., Gillissen, B., Kuhn, C., Frommer, W.B., 2003.  
587 Transport of cytokinins mediated by purine transporters of the PUP family expressed in phloem,  
588 hydathodes, and pollen of *Arabidopsis*. *Plant J.* 34, 13–26. <https://doi.org/10.1046/j.1365-313X.2003.01700.x>
- 590 Carpaneto, A., Geiger, D., Bamberg, E., Sauer, N., Fromm, J., Hedrich, R., 2005. Phloem-localized, proton-  
591 coupled sucrose carrier ZmSUT1 mediates sucrose efflux under the control of the sucrose gradient  
592 and the proton motive force. *J. Biol. Chem.* 280, 21437–21443.  
593 <https://doi.org/10.1074/jbc.M501785200>
- 594 Chen, L.-Q., Hou, B.-H., Lalonde, S., Takanaga, H., Hartung, M.L., Qu, X.-Q., Guo, W.-J., Kim, J.-G.,  
595 Underwood, W., Chaudhuri, B., Chermak, D., Antony, G., White, F.F., Somerville, S.C., Mudgett, M.B.,  
596 Frommer, W.B., 2010. Sugar transporters for intercellular exchange and nutrition of pathogens.  
597 *Nature* 468, 527–532. <https://doi.org/10.1038/nature09606>
- 598 Chen, L.Q., Qu, X.Q., Hou, B.H., Sosso, D., Osorio, S., Fernie, A.R., Frommer, W.B., 2012. Sucrose efflux  
599 mediated by SWEET proteins as a key step for phloem transport. *Science* (80- ). 335, 207–211.  
600 <https://doi.org/10.1126/science.1213351>
- 601 Crocoll, C., Halkier, B.A., Burow, M., 2016. Analysis and Quantification of Glucosinolates. *Curr. Protoc. Plant*  
602 *Biol.* 1, 385–409. <https://doi.org/10.1002/cppb.20027>
- 603 Dastmalchi, M., Chang, L., Chen, R., Yu, L., Chen, X., Hagel, J.M., Facchini, P.J., 2019. Purine Permease-Type  
604 Benzylisoquinoline Alkaloid Transporters in Opium Poppy 1. *Plant Physiol.* 181, 916–933.  
605 <https://doi.org/10.1104/pp.19.00565>
- 606 De Jonge, P.C., Wieringa, T., Van Putten, J.P.M., Michiel, H., Krans, J., Van Dam, K., 1983. Phloretin - an  
607 uncoupler and an inhibitor of mitochondrial oxidative phosphorylation. *BBA - Bioenerg.* 722, 219–225.  
608 [https://doi.org/10.1016/0005-2728\(83\)90177-9](https://doi.org/10.1016/0005-2728(83)90177-9)
- 609 Delmulle, T., De Maeseneire, S.L., De Mey, M., 2018. Challenges in the microbial production of flavonoids.  
610 *Phytochem. Rev.* <https://doi.org/10.1007/s11101-017-9515-3>
- 611 Doroshenko, V., Airich, L., Vitushkina, M., Kolokolova, A., Livshits, V., Mashko, S., 2007. YddG from  
612 *Escherichia coli* promotes export of aromatic amino acids. *FEMS Microbiol. Lett.* 275, 312–318.  
613 <https://doi.org/10.1111/j.1574-6968.2007.00894.x>
- 614 Doshi, R., Nguyen, T., Chang, G., 2013. Transporter-mediated biofuel secretion. *Proc. Natl. Acad. Sci. U. S. A.*  
615 110, 7642–7. <https://doi.org/10.1073/pnas.1301358110>

- 616 Ehrenkranz, J.R.L., Lewis, N.G., Ronald Kahn, C., Roth, J., 2005. Phlorizin: a review. *Diabetes. Metab. Res.*  
617 *Rev.* 21, 31–38. <https://doi.org/10.1002/dmrr.532>
- 618 Eichenberger, M., Lehka, B.J., Folly, C., Fischer, D., Martens, S., Simón, E., Naesby, M., 2017. Metabolic  
619 engineering of *Saccharomyces cerevisiae* for de novo production of dihydrochalcones with known  
620 antioxidant, antidiabetic, and sweet tasting properties. *Metab. Eng.* 39, 80–89.  
621 <https://doi.org/10.1016/j.ymben.2016.10.019>
- 622 Fisher, M.A., Boyarskiy, S., Yamada, M.R., Kong, N., Bauer, S., Tullman-Ercek, D., 2014. Enhancing Tolerance  
623 to Short-Chain Alcohols by Engineering the *Escherichia coli* AcrB Efflux Pump to Secrete the Non-  
624 native Substrate *n*-Butanol. *ACS Synth. Biol.* 3, 30–40. <https://doi.org/10.1021/sb400065q>
- 625 Foo, J., Leong, S., 2013. Directed evolution of an *E. coli* inner membrane transporter for improved efflux of  
626 biofuel molecules. *Biotechnol. Biofuels* 6, 81. <https://doi.org/10.1186/1754-6834-6-81>
- 627 Galanie, S., Smolke, C.D., 2015. Optimization of yeast-based production of medicinal protoberberine  
628 alkaloids. *Microb. Cell Fact.* 14, 144. <https://doi.org/10.1186/s12934-015-0332-3>
- 629 Gillissen, B., Bürkle, L., André, B., Kühn, C., Rentsch, D., Brandl, B., Frommer, W.B., 2000. A New Family of  
630 High-Affinity Transporters for Adenine, Cytosine, and Purine Derivatives in *Arabidopsis*, *The Plant Cell*.
- 631 Hildreth, S.B., Gehman, E.A., Yang, H., Lu, R.-H., K C, R., Harich, K.C., Yu, S., Lin, J., Sandoe, J.L., Okumoto, S.,  
632 Murphy, A.S., Jelesko, J.G., 2011. Tobacco nicotine uptake permease (NUP1) affects alkaloid  
633 metabolism. *Proc. Natl. Acad. Sci.* 108, 18179–18184. <https://doi.org/10.1073/pnas.1108620108>
- 634 Jelesko, J.G., 2012. An expanding role for purine uptake permease-like transporters in plant secondary  
635 metabolism. *Front. Plant Sci.* 3, 78. <https://doi.org/10.3389/fpls.2012.00078>
- 636 Jones, C.M., Hernández Lozada, N.J., Pflieger, B.F., 2015. Efflux systems in bacteria and their metabolic  
637 engineering applications. *Appl. Microbiol. Biotechnol.* 99, 9381–9393.  
638 <https://doi.org/10.1007/s00253-015-6963-9>
- 639 Jørgensen, M., Crocoll, C., Halkier, B., Nour-Eldin, H., 2017a. Uptake Assays in *Xenopus laevis* Oocytes Using  
640 Liquid Chromatography-mass Spectrometry to Detect Transport Activity. *BIO-PROTOCOL* 7.  
641 <https://doi.org/10.21769/BioProtoc.2581>
- 642 Jørgensen, M.E., Olsen, C.E., Geiger, D., Mirza, O., Halkier, B.A., Nour-Eldin, H.H., 2015. A Functional EXXEK  
643 Motif is Essential for Proton Coupling and Active Glucosinolate Transport by NPF2.11. *Plant Cell*  
644 *Physiol.* 56, 2340–2350. <https://doi.org/10.1093/pcp/pcv145>
- 645 Jørgensen, M.E., Xu, D., Crocoll, C., Ernst, H.A., Ramírez, D., Motawia, M.S., Olsen, C.E., Mirza, O., Nour-  
646 Eldin, H., Halkier, B.A., 2017b. Origin and evolution of transporter substrate specificity within the NPF  
647 family. <https://doi.org/10.7554/eLife.19466.001>
- 648 Kakegawa, H., Shitan, N., Kusano, H., Ogita, S., Yazaki, K., Sugiyama, A., 2019. Uptake of adenine by purine  
649 permeases of *Coffea canephora*. *Biosci. Biotechnol. Biochem.* 1–6.  
650 <https://doi.org/10.1080/09168451.2019.1606698>
- 651 Kang, J., Park, J., Choi, H., Burla, B., Kretschmar, T., Lee, Y., Martinoia, E., 2011. Plant ABC Transporters.  
652 *Arab. B.* 9, e0153. <https://doi.org/10.1199/tab.0153>
- 653 Kasahara, T., Maeda, M., Boles, E., Kasahara, M., 2009. Identification of a key residue determining substrate  
654 affinity in the human glucose transporter GLUT1. *Biochim. Biophys. Acta - Biomembr.* 1788, 1051–

- 655 1055. <https://doi.org/10.1016/j.bbamem.2009.01.014>
- 656 Kato, K., Shitan, N., Shoji, T., Hashimoto, T., 2015. Tobacco NUP1 transports both tobacco alkaloids and  
657 vitamin B6. *Phytochemistry* 113, 33–40. <https://doi.org/10.1016/J.PHYTOCHEM.2014.05.011>
- 658 Keasling, J.D., 2012. Synthetic biology and the development of tools for metabolic engineering. *Metab. Eng.*  
659 14, 189–195. <https://doi.org/10.1016/J.YMBEN.2012.01.004>
- 660 Kramer, C.K., Zinman, B., 2019. Sodium–Glucose Cotransporter–2 (SGLT-2) Inhibitors and the Treatment of  
661 Type 2 Diabetes. *Annu. Rev. Med.* 70, 323–334. <https://doi.org/10.1146/annurev-med-042017-094221>  
662
- 663 Krivoruchko, A., Nielsen, J., 2015. Production of natural products through metabolic engineering of  
664 *Saccharomyces cerevisiae*. *Curr. Opin. Biotechnol.* 35, 7–15.  
665 <https://doi.org/10.1016/J.COPBIO.2014.12.004>
- 666 Lam, M., Scaman, C.H., Clemens, S., Kermode, A., 2008. Retention of phenylalanine ammonia-lyase activity  
667 in wheat seedlings during storage and in vitro digestion. *J. Agric. Food Chem.* 56, 11407–11412.  
668 <https://doi.org/10.1021/jf8021942>
- 669 Larsen, B., Fuller, V.L., Pollier, J., Van Moerkercke, A., Schweizer, F., Payne, R., Colinas, M., O’Connor, S.E.,  
670 Goossens, A., Halkier, B.A., 2017a. Identification of Iridoid Glucoside Transporters in *Catharanthus*  
671 *roseus*. *Plant Cell Physiol.* 58, 1507–1518. <https://doi.org/10.1093/pcp/pcx097>
- 672 Larsen, B., Xu, D., Halkier, B.A., Nour-Eldin, H.H., 2017b. Advances in methods for identification and  
673 characterization of plant transporter function. *J. Exp. Bot.* 68, 4045–4056.  
674 <https://doi.org/10.1093/jxb/erx140>
- 675 Lee, J.W., Na, D., Park, J.M., Lee, J., Choi, S., Lee, S.Y., 2012. Systems metabolic engineering of  
676 microorganisms for natural and non-natural chemicals. *Nat. Chem. Biol.* 8, 536–546.  
677 <https://doi.org/10.1038/nchembio.970>
- 678 Li, M., Kildegaard, K.R., Chen, Y., Rodriguez, A., Borodina, I., Nielsen, J., 2015. De novo production of  
679 resveratrol from glucose or ethanol by engineered *Saccharomyces cerevisiae*. *Metab. Eng.* 32, 1–11.  
680 <https://doi.org/10.1016/J.YMBEN.2015.08.007>
- 681 Lim, C.G., Wong, L., Bhan, N., Dvora, H., Xu, P., Venkiteswaran, S., Koffas, M.A.G., 2015. Development of a  
682 Recombinant *Escherichia coli* Strain for Overproduction of the Plant Pigment Anthocyanin. *Appl.*  
683 *Environ. Microbiol.* 81, 6276–6284. <https://doi.org/10.1128/aem.01448-15>
- 684 Lin, I.W., Sosso, D., Chen, L.-Q., Gase, K., Kim, S.-G., Kessler, D., Klinkenberg, P.M., Gorder, M.K., Hou, B.-H.,  
685 Qu, X.-Q., Carter, C.J., Baldwin, I.T., Frommer, W.B., 2014. Nectar secretion requires sucrose  
686 phosphate synthases and the sugar transporter SWEET9. *Nature* 508, 546–549.  
687 <https://doi.org/10.1038/nature13082>
- 688 Liu, X., Ding, W., Jiang, H., 2017. Engineering microbial cell factories for the production of plant natural  
689 products: from design principles to industrial-scale production. *Microb. Cell Fact.* 16, 125.  
690 <https://doi.org/10.1186/s12934-017-0732-7>
- 691 Lv, H., Li, J., Wu, Y., Garyali, S., Wang, Y., 2016. Transporter and its engineering for secondary metabolites.  
692 *Appl. Microbiol. Biotechnol.* 100, 6119–6130. <https://doi.org/10.1007/s00253-016-7605-6>
- 693 Meng, W., Ellsworth, B.A., Nirschl, A.A., McCann, P.J., Patel, M., Girotra, R.N., Wu, G., Sher, P.M., Morrison,

- 694 E.P., Biller, S.A., Zahler, R., Deshpande, P.P., Pullockaran, A., Hagan, D.L., Morgan, N., Taylor, J.R.,  
695 Obermeier, M.T., Humphreys, W.G., Khanna, A., Discenza, L., Robertson, J.G., Wang, A., Han, S.,  
696 Wetterau, J.R., Janovitz, E.B., Flint, O.P., Whaley, J.M., Washburn, W.N., 2008. Discovery of  
697 dapagliflozin: A potent, selective renal sodium-dependent glucose cotransporter 2 (SGLT2) inhibitor  
698 for the treatment of type 2 diabetes. *J. Med. Chem.* 51, 1145–1149.  
699 <https://doi.org/10.1021/jm701272q>
- 700 Nomura, S., Sakamaki, S., Hongu, M., Kawanishi, E., Koga, Y., Sakamoto, T., Yamamoto, Y., Ueta, K., Kimata,  
701 H., Nakayama, K., Tsuda-Tsukimoto, M., 2010. Discovery of Canagliflozin, a Novel C-Glucoside with  
702 Thiophene Ring, as Sodium-Dependent Glucose Cotransporter 2 Inhibitor for the Treatment of Type 2  
703 Diabetes Mellitus 1. *J. Med. Chem* 53, 6355. <https://doi.org/10.1021/jm100332n>
- 704 Nour-Eldin, H.H., Andersen, T.G., Burow, M., Madsen, S.R., Jørgensen, M.E., Olsen, C.E., Dreyer, I., Hedrich,  
705 R., Geiger, D., Halkier, B.A., 2012. NRT/PTR transporters are essential for translocation of glucosinolate  
706 defence compounds to seeds. *Nature* 488, 531–534. <https://doi.org/10.1038/nature11285>
- 707 Nour-Eldin, H.H., Geu-Flores, F., Halkier, B.A., 2010. USER Cloning and USER Fusion: The Ideal Cloning  
708 Techniques for Small and Big Laboratories. Humana Press, Totowa, NJ, pp. 185–200.  
709 [https://doi.org/10.1007/978-1-60761-723-5\\_13](https://doi.org/10.1007/978-1-60761-723-5_13)
- 710 Nour-Eldin, H.H., Halkier, B.A., 2013. The emerging field of transport engineering of plant specialized  
711 metabolites. *Curr. Opin. Biotechnol.* 24, 263–270. <https://doi.org/10.1016/J.COPBIO.2012.09.006>
- 712 Nour-Eldin, H.H., Nørholm, M.H., Halkier, B.A., 2006. Screening for plant transporter function by expressing  
713 a normalized Arabidopsis full-length cDNA library in *Xenopus* oocytes. *Plant Methods* 2, 17.  
714 <https://doi.org/10.1186/1746-4811-2-17>
- 715 Pattanawongsa, A., Chau, N., Rowland, A., Miners, J.O., 2015. Inhibition of human UDP-  
716 glucuronosyltransferase enzymes by canagliflozin and dapagliflozin: Implications for drug-drug  
717 interactions. *Drug Metab. Dispos.* 43, 1468–1476. <https://doi.org/10.1124/dmd.115.065870>
- 718 Qi, Z., Xiong, L., 2013. Characterization of a Purine Permease Family Gene *Os PUP 7* Involved in Growth and  
719 Development Control in Rice. *J. Integr. Plant Biol.* 55, 1119–1135. <https://doi.org/10.1111/jipb.12101>
- 720 Rodriguez, A., Kildegaard, K.R., Li, M., Borodina, I., Nielsen, J., 2015. Establishment of a yeast platform strain  
721 for production of p-coumaric acid through metabolic engineering of aromatic amino acid biosynthesis.  
722 *Metab. Eng.* 31, 181–188. <https://doi.org/10.1016/j.ymben.2015.08.003>
- 723 Sarma, A.D., Sharma, R., 1999. Purification and characterization of UV-B induced phenylalanine ammonia-  
724 lyase from rice seedlings. *Phytochemistry* 50, 729–737. [https://doi.org/10.1016/S0031-9422\(98\)00608-6](https://doi.org/10.1016/S0031-9422(98)00608-6)
- 726 Scheen, A.J., 2015. Pharmacokinetics, Pharmacodynamics and Clinical Use of SGLT2 Inhibitors in Patients  
727 with Type 2 Diabetes Mellitus and Chronic Kidney Disease. *Clin. Pharmacokinet.* 54, 691–708.  
728 <https://doi.org/10.1007/s40262-015-0264-4>
- 729 Schwacke, R., Schneider, A., Van Der Graaff, E., Fischer, K., Catoni, E., Desimone, M., Frommer, W.B., Flüg,  
730 U.-I., Kunze, R., 2003. Genome Analysis ARAMEMNON, a Novel Database for Arabidopsis Integral  
731 Membrane Proteins 1. <https://doi.org/10.1104/pp.011577>
- 732 Shitan, N., 2016. Secondary metabolites in plants: transport and self-tolerance mechanisms. *Biosci.*  
733 *Biotechnol. Biochem.* 80, 1283–1293. <https://doi.org/10.1080/09168451.2016.1151344>

- 734 Shu, C.-H., Liao, C.-C., 2002. Optimization of L-phenylalanine production of *Corynebacterium glutamicum*  
735 under product feedback inhibition by elevated oxygen transfer rate. *Biotechnol. Bioeng.* 77, 131–141.  
736 <https://doi.org/10.1002/bit.10125>
- 737 Suzuki, S., Koeduka, T., Sugiyama, A., Yazaki, K., Umezawa, T., 2014. Microbial production of plant  
738 specialized metabolites. *Plant Biotechnol.* 31, 465–482.  
739 <https://doi.org/10.5511/plantbiotechnology.14.1003a>
- 740 Szydlowski, N., Bürkle, L., Pourcel, L., Moulin, M., Stolz, J., Fitzpatrick, T.B., 2013. Recycling of pyridoxine  
741 (vitamin B6) by PUP1 in *Arabidopsis*. *Plant J.* 75, 40–52. <https://doi.org/10.1111/tpj.12195>
- 742 Wulff, N., Ernst, H.A., Jørgensen, M.E., Lambertz, S., Maierhofer, T., Belew, Z.M., Crocoll, C., Motawia, M.S.,  
743 Geiger, D., Jørgensen, F.S., Mirza, O., Nour-Eldin, H.H., 2019. An Optimized Screen Reduces the  
744 Number of GA Transporters and provides Insights into NPF Substrate Determinants. *bioRxiv* 670174.  
745 <https://doi.org/10.1101/670174>
- 746 Yazaki, K., 2005. Transporters of secondary metabolites. *Curr. Opin. Plant Biol.*  
747 <https://doi.org/10.1016/j.pbi.2005.03.011>
- 748 Yin, R., Messner, B., Faus-Kessler, T., Hoffmann, T., Schwab, W., Hajirezaei, M.R., Von Saint Paul, V., Heller,  
749 W., Schäffner, A.R., 2012. Feedback inhibition of the general phenylpropanoid and flavonol  
750 biosynthetic pathways upon a compromised flavonol-3-O-glycosylation. *J. Exp. Bot.* 63, 2465–2478.  
751 <https://doi.org/10.1093/jxb/err416>
- 752 Zhang, J., Reddy, J., Buckland, B., Greasham, R., 2003. Toward consistent and productive complex media for  
753 industrial fermentations: Studies on yeast extract for a recombinant yeast fermentation process.  
754 *Biotechnol. Bioeng.* 82, 640–652. <https://doi.org/10.1002/bit.10608>
- 755 Zhang, T., Liang, J., Wang, P., Xu, Y., Wang, Y., Wei, X., Fan, M., 2016. Purification and characterization of a  
756 novel phloretin-2'-O-glycosyltransferase favoring phloridzin biosynthesis. *Sci. Rep.* 6, 35274.  
757 <https://doi.org/10.1038/srep35274>
- 758 Zürcher, E., Liu, J., di Donato, M., Geisler, M., Müller, B., 2016. Plant development regulated by cytokinin  
759 sinks. *Science* 353, 1027–1030. <https://doi.org/10.1126/science.aaf7254>
